# Supplementary material for: Sol–gel chemistry for graphene–silica nanocomposite films
Source: Royal Society of Chemistry journal article supplement (doi:10.1039/c4nj00535j), 2014-01-01
Supplement: c4nj00535j1.pdf [file c4nj00535j1.pdf]

## Electronic Supplementary Information (ESI)

# Sol-gel chemistry for graphene-silica nanocomposite films

Plinio Innocenzi<sup>1</sup>, Luca Malfatti<sup>1</sup>, Barbara Lasio<sup>1</sup>, Alessandra Pinna<sup>1</sup>, Danilo Loche<sup>2</sup>, Maria F. Casula<sup>2</sup>, Valeria Alzari<sup>3</sup>, Alberto Mariani<sup>3</sup>

<sup>1</sup>Laboratorio di Scienza dei Materiali e Nanotecnologie, CR-INSTM, Università di Sassari, Palazzo Pou Salid, Piazza Duomo 6, 07041 Alghero (SS), Italy

<sup>2</sup>Dipartimento di Scienze Chimiche e Geologiche Università di Cagliari, 09042 Monserrato, (CA) (Italy)

<sup>3</sup>Dipartimento di Chimica e Farmacia, Università di Sassari, Local INSTM Unit, Via Vienna 2, 07100 Sassari, Italy

E-mail: plinio@uniss.it

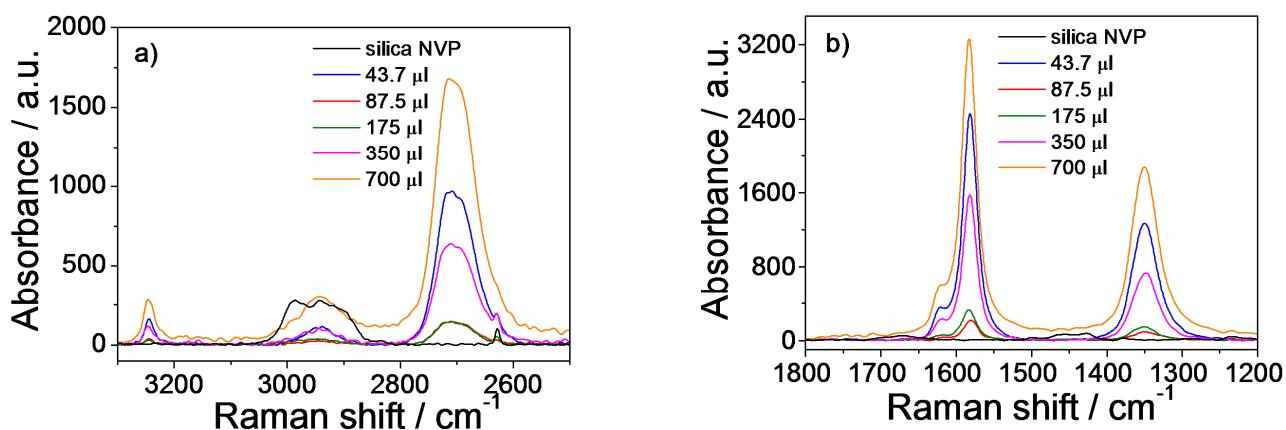

**Figure S1.** Raman spectra in the range 3300 - 2500 cm<sup>-1</sup> (a) and 1800 - 1200 cm<sup>-1</sup> (b) of graphene-silica films prepared from sols with various concentrations of graphene (43.7, 87.5, 175, 350 and 700 μl), and silica film with 700 μl of NVP (spectra in black color). The film are thermal treated at 100°C.

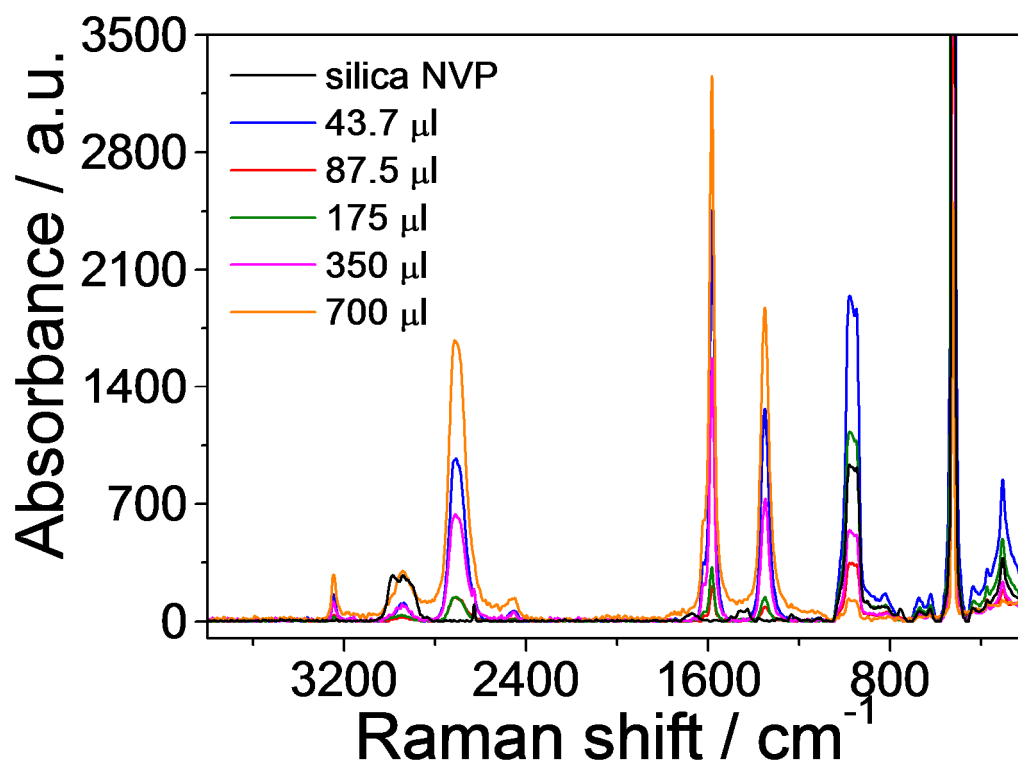

**Figure S2.** Raman spectra in the range 3800 - 200 cm<sup>-1</sup> of graphene-silica films prepared from sols with various concentrations of graphene (43.7, 87.5, 175, 350 and 700 μl), and silica film with 700 μl of NVP (black color spectrum). The film are thermal treated at 100°C.

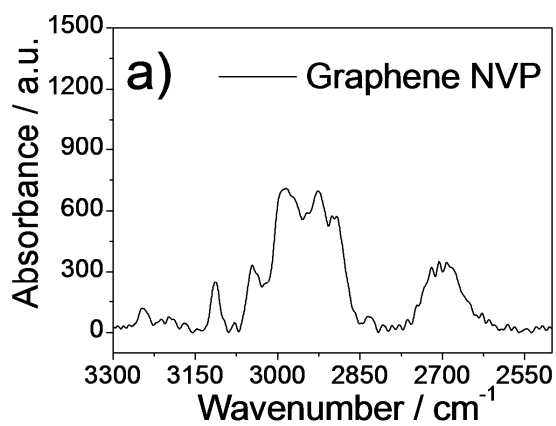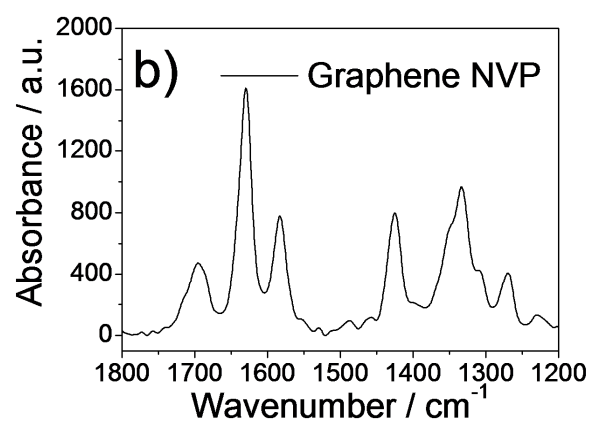

**Figure S3.** Raman spectra in the range 3300 - 2500 cm<sup>-1</sup> (a) and 1800 - 1200 cm<sup>-1</sup> (b) of graphene NVP suspension cast on silicon substrate.
